# Supplementary material
Source: publisher figshare collection journal article supplement (https://gsapubs.figshare.com/ndownloader/files/23316404)
Supplement: Supplementary file 1 [file 23316404]

1 GSA Data Repository 2019225

2  
3 Gold, arsenic, and copper zoning in pyrite: a record of fluid  
4 chemistry and growth kinetics

5 **Ya-Fei Wu<sup>1,2</sup>, Denis Fougereuse<sup>2,3</sup>, Katy Evans<sup>2</sup>, Steven M. Reddy<sup>2,3</sup>, David W. Saxey<sup>3</sup>,**  
6 **Paul Guagliardo<sup>4</sup>, Jian-Wei Li<sup>1†</sup>**

7 <sup>1</sup> *State Key Laboratory of Geological Processes and Mineral Resources and School of Earth*  
8 *Resources, China University of Geosciences, Wuhan, Hubei Province 430074, China*

9 <sup>2</sup> *School of Earth and Planetary Sciences, Curtin University, GPO Box U1987, Perth, WA 6845,*  
10 *Australia*

11 <sup>3</sup> *Geoscience Atom Probe, Advanced Resource Characterisation Facility, John de Laeter Centre,*  
12 *Curtin University, GPO Box U1987, Perth, WA, 6845, Australia*

13 <sup>4</sup> *Centre for Microscopy, Characterisation and Analysis, The University of Western Australia, 35*  
14 *Stirling Highway, Crawley, WA 6009, Australia*

15

16

17

## **A1. List of supplementary figures and tables**

Figure DR1. Zoned (A), framboidal (B), and colloform (C) pyrite in the hydrothermal cements of Daqiao breccia ores. Py–Pyrite. Scale bar is 10  $\mu\text{m}$ .

Figure DR2. Atom probe mass spectrum. Peaks are color-coded by atomic or molecular species.

Figure DR3. Line profile (B) and diagrams of mean elemental counts (C-E) for different regions on NanoSIMS arsenic ( $^{75}\text{As}^{32}\text{S}$ ) map (A) showing the correlations between Cu, As, and Au.

Table DR1. Analysis and reconstruction parameters for atom probe data following recommendation of Blum et al. (2018).

Table DR2. Arsenic, Au, and Cu compositions of three atom probe specimens from the Daqiao Au-rich zoned pyrite.

## **A2. Analytical methods**

### **A2.1 NanoSIMS analysis**

NanoSIMS analysis was performed on polished epoxy mounts at the Centre for Microscopy, Characterisation and Analysis (CMCA) at the University of Western Australia (UWA), using a CAMECA NanoSIMS 50L optimized as described by Wu et al. (2019). A  $\text{Cs}^+$  ion source with a spot size of approximately 50 nm was employed. Multiple electron multipliers record ion counts from the same sputtered sample volume at seven masses simultaneously.

Each region of interest was pre-sputtered using a beam current of 250 pA, to remove surface contaminants and implant  $\text{Cs}^+$  ions into the sample matrix to achieve a steady state of secondary ion emission. Negative secondary ions of interest ( $^{63}\text{Cu}^{32}\text{S}^-$ ,  $^{75}\text{As}^{32}\text{S}^-$ , and  $^{197}\text{Au}^-$ ) were then sputtered from the sample surface using a beam current of  $\sim 2.5$  pA. The electron gun was used for charge compensation because the samples were predominantly composed of insulating

materials. Analysis areas ranged in size from  $15 \times 15$  to  $40 \times 40 \mu\text{m}^2$ , the image sizes were  $256 \times 256$  to  $512 \times 512$  pixels, and the dwell times were 40–160 ms per pixel. NanoSIMS images were processed using ImageJ. The ion intensity of each trace element provides a simple, semi-quantitative expression of localized trace element enrichment.

## **A2.2 Atom probe analysis**

Three atom probe needle-shaped specimens (inset of Fig. 2A) from the zoned pyrite were prepared and analyzed at the Advanced Resource Characterization Facility at Curtin University. The specimens were prepared using a Tescan Lyra3 Focused Ion Beam Scanning Electron Microscope (FIB-SEM) with a  $\text{Ga}^+$  ion source, employing standard lift-out techniques (Thompson et al., 2007). A Cameca LEAP 4000X HR in laser assisted mode was employed for analysis. Approximately 10 to 76 million ions (Table DR1) were collected from each specimen at an evaporation rate of 0.01 ions/pulse, a UV laser ( $\lambda = 355 \text{ nm}$ ) pulse energy of 30 to 50 pJ, and a pulse rate of 125 kHz, at a base temperature of 50 K. Peaks were identified and ranged using the Cameca IVAS 3.8 processing software (Fig. DR2). Compositions of specific domains were isolated by volumes defined by concentration isosurfaces (Hellman et al., 2000). The background noise, mass peak overlaps and detector saturation are assessed from the data sets themselves, with uncertainties typically comparable to those arising from the counting statistics for each atomic species. Minor overlapping of  $\text{Au}^+$  by  $\text{FeAsS}_2^+$  (e.g.,  $^{56}\text{Fe}^{75}\text{As}^{32}\text{S}^{34}\text{S}^+$ ) in specimen 3 (Fig. DR2) has been corrected via the percentage calculation and deduction of this part of  $\text{FeAsS}_2^+$  molecule following the peak decomposition method (Sha et al., 1992; Dmitrieva et al., 2011). This overlap was significantly reduced by lowering the laser energy from 50 to 30 pJ. APT offers a novel method that allows atom-resolution quantitative three-dimensional

elemental mapping of ion distributions down to 10 appm (atomic parts per million) concentrations (Kelly and Larson, 2012).

### **A3. References cited**

- Blum, T.B., Darling, J.R., Kelly, T.F., Larson, D.J., Moser, D.E., Perez-Huerta, A., Prosa, T.J., Reddy, S.M., Reinhard, D.A., and Saxey, D.W., 2018, Best practices for reporting atom probe analysis of geological materials: Microstructural Geochronology: Planetary Records Down to Atom Scale, v. 232, p. 369–373.
- Dmitrieva, O., Choi, P., Gerstl, S., Ponge, D., and Raabe, D., 2011, Pulsed-laser atom probe studies of a precipitation hardened maraging TRIP steel: Ultramicroscopy, v. 111, p. 623–627.
- Hellman, O.C., Vandenbroucke, J.A., Rüsing, J., Isheim, D., and Seidman, D.N., 2000, Analysis of three-dimensional atom-probe data by the proximity histogram: Microscopy and Microanalysis, v. 6, p. 437–444.
- Kelly, T.F., and Larson, D.J., 2012, Atom probe tomography 2012: Annual Review of Materials Research, v. 42, p. 1–31.
- Sha, W., Chang, L., Smith, G., Cheng, L., and Mittemeijer, E., 1992, Some aspects of atom-probe analysis of Fe-C and Fe-N systems: Surface Science, v. 266, p. 416–423.
- Thompson, K., Lawrence, D., Larson, D., Olson, J., Kelly, T., and Gorman, B., 2007, In situ site-specific specimen preparation for atom probe tomography: Ultramicroscopy, v. 107, p. 131–139.
- Wu, Y.F., Evans, K., Li, J.W., Fougereuse, D., Large, R.R., and Guagliardo, P., 2019, Metal remobilization and ore-fluid perturbation during episodic replacement of auriferous pyrite

84 from an epizonal orogenic gold deposit: *Geochimica et Cosmochimica Acta*, v. 245, p. 98–  
85 117.

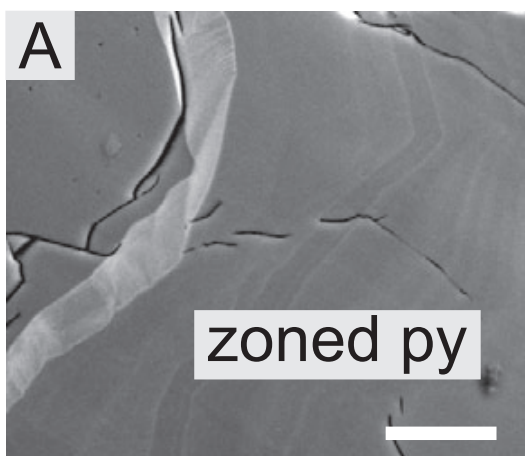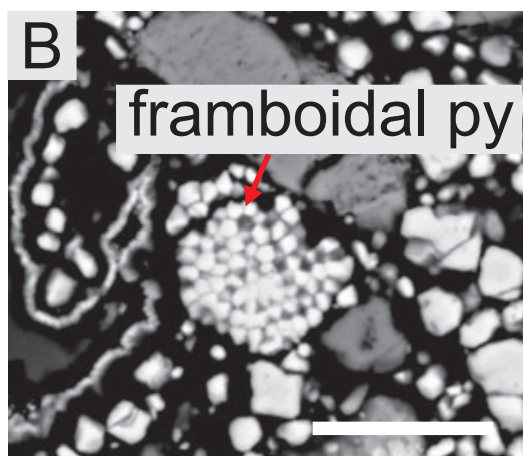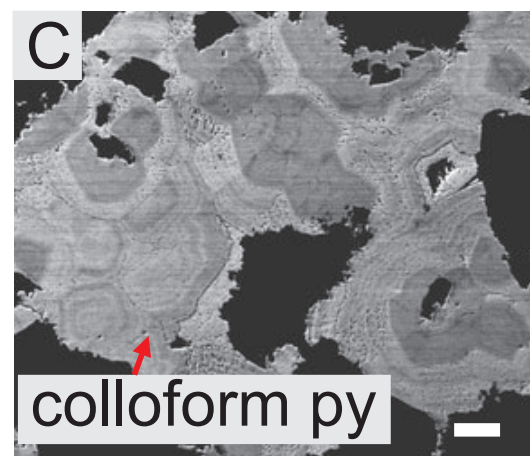

Fig. DR1

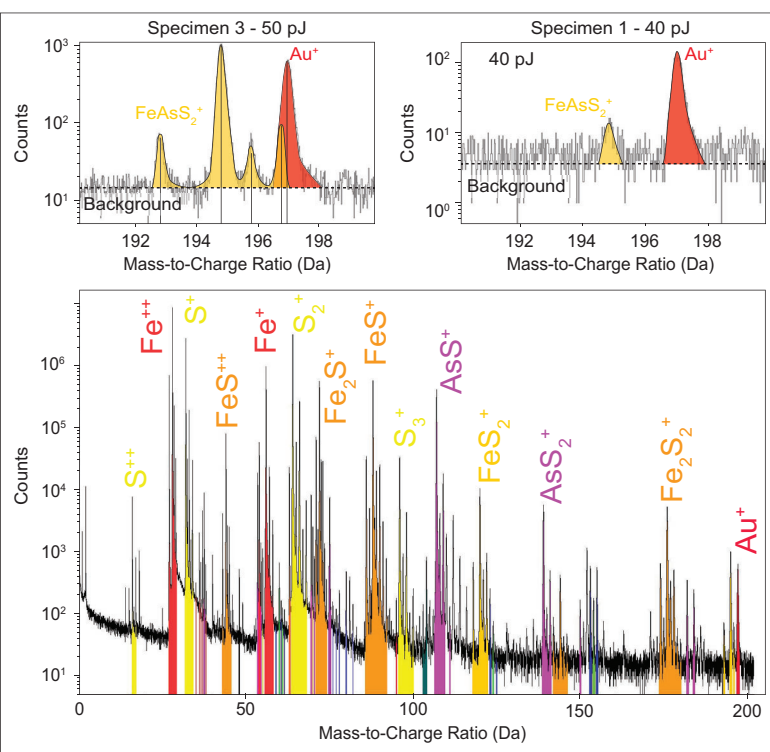

Fig. DR2

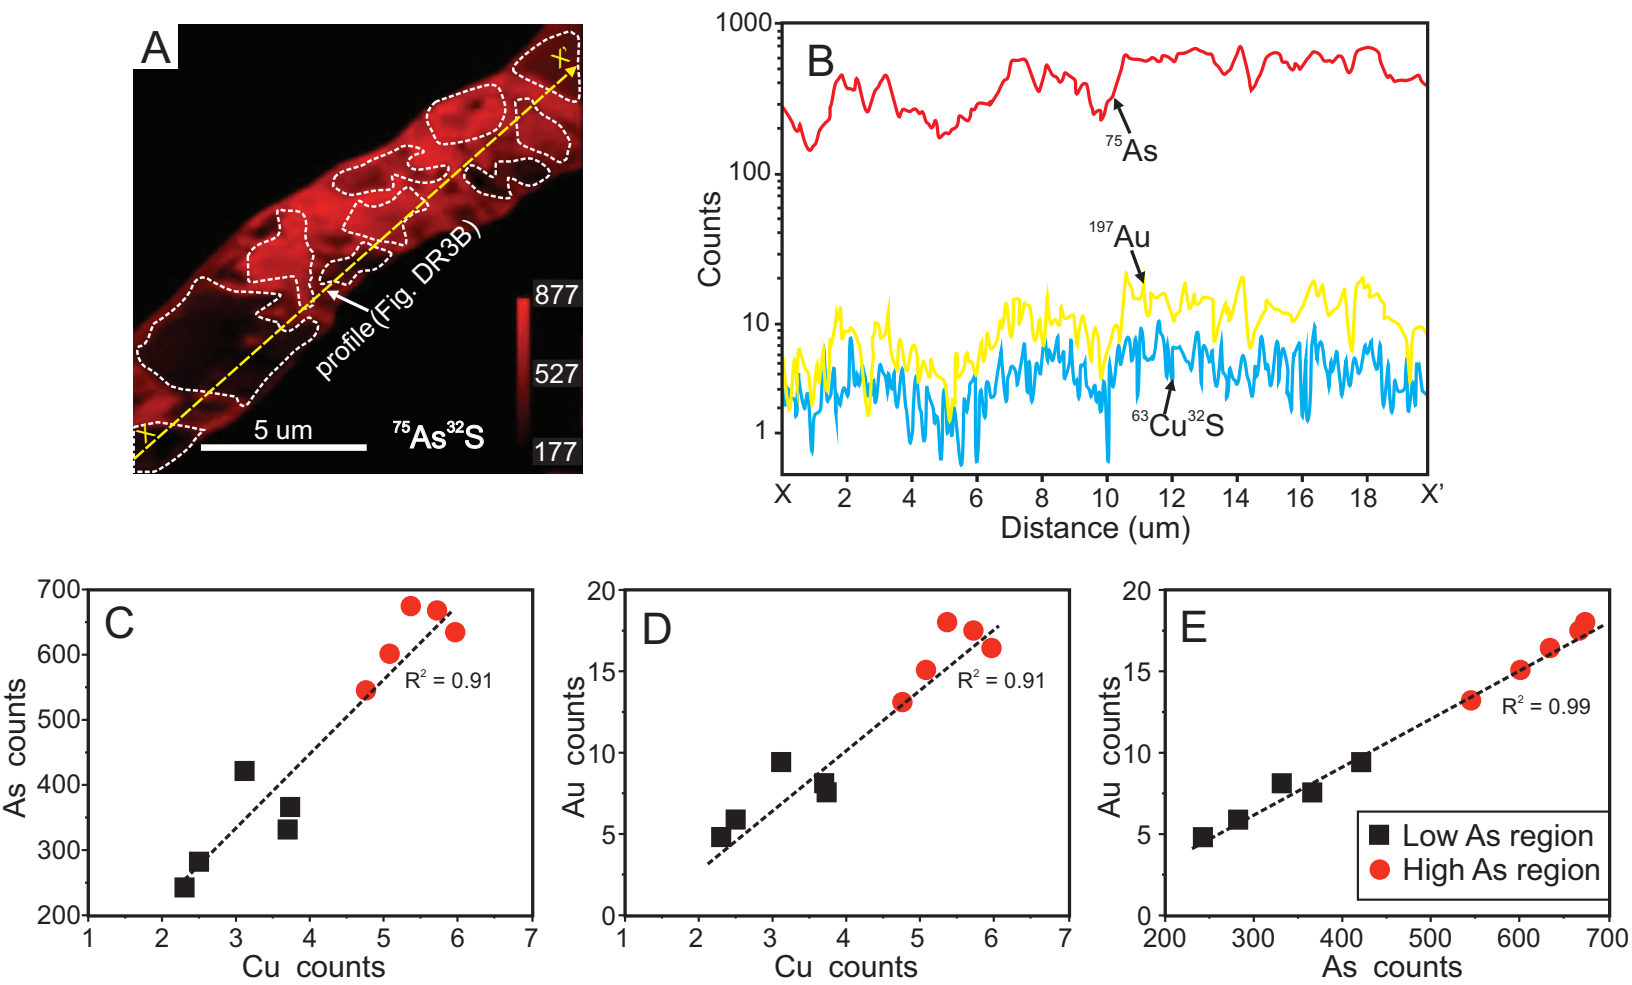

Fig. DR3

TABLE DR1. ANALYSIS AND RECONSTRUCTION PARAMETERS FOR  
ATOM PROBE DATA FOLLOWING RECOMMENDATION OF BLUM ET  
AL. (2018).

| Specimen/data Set                                              | Specimen 1            | Specimen 2            | Specimen 3            |
|----------------------------------------------------------------|-----------------------|-----------------------|-----------------------|
| Instrument model                                               | LEAP 4000X HR         |                       |                       |
| <u>Instrument settings</u>                                     |                       |                       |                       |
| Laser wavelength (nm)                                          | 355                   | 355                   | 355                   |
| Laser pulse energy (pJ)                                        | 30                    | 40                    | 50                    |
| Pulse frequency (kHz)                                          | 125                   | 125                   | 125                   |
| Evaporation control                                            | Detection rate        | Detection rate        | Detection rate        |
| Target detection rate (ions/pulse)                             | 0.01                  | 0.01                  | 0.01                  |
| Nominal flight path (mm)                                       | 382                   | 382                   | 382                   |
| Set point temperature (K)                                      | 50                    | 50                    | 50                    |
| Chamber pressure (Torr)                                        | 1.3x10 <sup>-10</sup> | 1.3x10 <sup>-10</sup> | 1.2x10 <sup>-10</sup> |
| <u>Data summary</u>                                            |                       |                       |                       |
| LAS root version                                               | 15.41.342I            | 15.41.342I            | 15.41.342I            |
| CAMECAROOT version                                             | 18.44.416             | 18.44.416             | 18.44.416             |
| Analysis software                                              | IVAS 3.8              | IVAS 3.8              | IVAS 3.8              |
| Total ions:                                                    | 12,417,315            | 10,490,929            | 76,251,106            |
| Single                                                         | 56.4%                 | 60.2%                 | 62.6%                 |
| Multiple                                                       | 42.6%                 | 38.8%                 | 36.7%                 |
| Partial                                                        | 1.1%                  | 1.0%                  | 0.7%                  |
| Reconstructed ions:                                            | 11,813,609            | 9,216,276             | 72,600,477            |
| Ranged                                                         | 98.3%                 | 98.9%                 | 99.1%                 |
| Unranged                                                       | 1.7%                  | 1.1%                  | 0.9%                  |
| Volt./bowl corr. peak (Da)                                     | 16                    | 16                    | 16                    |
| Mass calib. (peaks/interp.)                                    | 5/Lin.                | 4/Lin.                | 5/Lin.                |
| <sup>†</sup> (M/ΔM) for <sup>32</sup> S <sup>++</sup>          | 666.6                 | 707.1                 | 822.8                 |
| <sup>††</sup> (M/ΔM <sub>10</sub> )                            | 296.6                 | 333.3                 | 405.4                 |
| time independent background (ppm/ns)                           | 2.5                   | 2.1                   | 1.8                   |
| <u>Reconstruction</u>                                          |                       |                       |                       |
| Final specimen state                                           | Fractured             | Fractured             | Fractured             |
| Pre-/post-analysis imaging                                     | SEM/n.a.              | SEM/n.a.              | SEM/n.a.              |
| Radius evolution model                                         | “voltage”             | “voltage”             | “voltage”             |
| Field factor (k)                                               | 3.3                   | 3.3                   | 3.3                   |
| Image compression factor                                       | 1.65                  | 1.65                  | 1.65                  |
| Assumed e-field (V/nm)                                         | 33                    | 33                    | 33                    |
| Detector efficiency                                            | 36%                   | 36%                   | 36%                   |
| Avg. atomic volume (nm <sup>3</sup> )                          | 0.0108                | 0.0108                | 0.0108                |
| V <sub>initial</sub> (V)                                       | 2,474                 | 3,566                 | 3,048                 |
| <sup>†</sup> ΔM is full width at half maximum.                 |                       |                       |                       |
| <sup>††</sup> ΔM <sub>10</sub> is full width at tenth maximum. |                       |                       |                       |

TABLE DR2. ARSENIC, Au, AND Cu COMPOSITIONS OF THREE ATOM PROBE SPECIMENS FROM THE DAQIAO Au-RICH ZONED PYRITE.

| Specimen no. | Arsenic (As) regions | As<br>(at. %)   | Au<br>(appm) | Cu<br>(appm)  |
|--------------|----------------------|-----------------|--------------|---------------|
| Specimen 1   | Homogeneous As       | $4.30 \pm 0.01$ | $131 \pm 3$  | $1028 \pm 8$  |
| Specimen 2   | High-As region       | $4.28 \pm 0.01$ | $164 \pm 5$  | $1189 \pm 14$ |
|              | Low-As region        | $2.11 \pm 0.01$ | $71 \pm 3$   | $640 \pm 10$  |
| Specimen 3   | High-As region       | $4.35 \pm 0.01$ | $118 \pm 6$  | $1087 \pm 17$ |
|              | Low-As region        | $2.22 \pm 0.01$ | $54 \pm 4$   | $713 \pm 14$  |
| Mean         |                      | $3.45 \pm 1.05$ | $108 \pm 40$ | $931 \pm 216$ |
